1 Title: **Characterization of Extensive Diversity In Immunoglobulin Light Chain Variable**

2 **Germline Genes Across Biomedically Important Mouse Strains**

3

4 Running Title: **Comparison of Immunoglobulin Light Chain Variable Germline Genes**

5 **Across Biomedically Important Mouse Strains**

6

7 Authors:

8 Justin T. Kos<sup>1</sup>, Yana Safonova<sup>2</sup>, Kaitlyn M. Shields<sup>1</sup>, Catherine A. Silver<sup>1</sup>, William D. Lees<sup>3</sup>,

9 Andrew M. Collins<sup>4</sup>, and Corey T. Watson<sup>1</sup>

10

11 Affiliations:

12 <sup>1</sup>Department of Biochemistry and Molecular Genetics, University of Louisville School of

13 Medicine, Louisville, KY, USA

14 <sup>2</sup>Department of Computer Science, Johns Hopkins University, Baltimore MD, USA

15 <sup>3</sup>Institute of Structural and Molecular Biology, Birkbeck College, University of London, London,

16 UK

17 <sup>4</sup>School of Biotechnology and Biomolecular Sciences, The University of New South Wales,

18 Sydney, NSW, Australia

19

20 Corresponding author(s): Justin T. Kos and Corey T. Watson

21

22

23

24 Abstract:

25

26 The light chain immunoglobulin genes of biomedically relevant mouse strains are poorly  
27 documented in current germline gene databases. We previously showed that IGH loci of wild-  
28 derived mouse strains representing the major mouse subspecies contained 247 germline IGHV  
29 sequences not curated in the international ImMunoGeneTics (IMGT) information system, which  
30 is the most commonly used database that curates the germline repertoires used for sequence  
31 alignment in AIRR-seq analysis. Despite containing levels of polymorphism similar to the IGH  
32 locus, the germline gene content and diversity of the light chain loci have not been  
33 comprehensively cataloged. To explore the extent of germline light chain repertoire diversity  
34 across mouse strains commonly used in the biomedical sciences, we performed AIRR-seq analysis  
35 and germline gene inference for 18 inbred mouse strains, including the four wild-derived strains  
36 with diverse sub-species origins. We inferred 1582 IGKV and 63 IGLV sequences, representing  
37 459 and 22 unique IGKV and IGLV sequences. Of the unique inferred germline IGKV and IGLV  
38 sequences, 67.8% and 59%, respectively, were undocumented in IMGT. Across strains we  
39 observed germline IGKV sequences shared by three distinct IGK haplotypes and a more conserved  
40 IGLV germline repertoire. In addition, J gene inference indicated a novel IGK2 allele shared  
41 between PWD/PhJ and MSM/MsJ and a novel IGLJ1 allele for LEWES/EiJ and IGLJ2 allele for  
42 MSM/MsJ. Finally, a combined IGHV, IGKV, and IGLV phylogenetic analysis of wild-derived  
43 germline repertoires displayed reduced germline diversity for the light chain repertoire compared  
44 to the heavy chain repertoire, suggesting potential evolutionary differences between the two  
45 chains.

46

47 (250 words)

48 Keywords: IGKV, IGLV, AIRR-seq, 129S1/SvImJ, A/J, AKR/J, BALB/cByJ, C3H/HeJ,

49 C57BL/6J, CAST/EiJ, CBA/J, DBA/1J, DBA/2J, LEWES/EiJ, MRL/MpJ, MSM/MsJ,

50 NOD/ShiLtJ, NOR/LtJ, NZB/BINJ, PWD/PhJ, SJL/J, germline repertoire, mouse

51

52

53

54

55

56

57

58

59

60

61

62

63

64

65

66

67

68

69

70

71

72

73

74

75

76

77

78

79

80

81

82

83

84

85

86

## 87 **Introduction**

88

89           Antibodies (Abs), encoded by the immunoglobulin (IG) loci, are critical components of the  
90 immune system that function as cell-surface and soluble receptors for antigens(1). The process of  
91 somatic V(D)J recombination within B cells governs the formation of a diverse Ab repertoire  
92 capable of recognizing a vast array of antigens through interaction with Ab variable domains(2).  
93 Abs are formed from two pairs of identical heavy and light (kappa or lambda) chains, encoded by  
94 genes at three different loci in the mouse genome. In mice, the IG heavy chain is encoded by genes  
95 at a single locus on chromosome 12 (IGH), whereas IG light chain genes are encoded at the IG  
96 kappa (IGK; chromosome 6) and IG lambda (IGL; chromosome 16) loci(1, 3). Abs are separated  
97 into two functional domains: variable (V) domains that bind antigen; and constant (C) domains  
98 that carry out effector functions such as complement activation and Fc receptor binding(4). The V  
99 domain is encoded by variable (V), diversity (D, IGH only), and joining (J) genes, while constant  
100 (C) genes encode the C domain. Together, V, D, J, and C genes somatically recombine in B cells  
101 to generate the Ab repertoire, the entire expressed component of Abs circulating within an  
102 organism.

103

104           The mouse IG loci are structurally complex and consist of repeated, highly homologous  
105 gene segments(5–7). For example, the IGH locus in the C57BL/6 strain comprises 102 variable  
106 (V), 9 diversity, 8 of which are unique (D; IGH only), 4 joining (J), and 8-9 constant (C)  
107 functional/open reading frame genes(5, 8). The IGK locus of C57BL/6 is similarly complex in this  
108 strain and spans 3.2 Mb, with 91 functional V segments, 4 functional J segments, and 1 C segment,  
109 representing approximately 95% of the C57BL/6 germline light chain genes(9, 10). In contrast,

110 the C57BL/6 IGL locus spans 240 kb and includes only 3 functional V segments, 3 functional J  
111 segments, and 3 C segments(5).

112

113 At the genomic level, the mouse IG loci have only been comprehensively characterized in  
114 the C57BL/6 strain. However, the C57BL/6 mouse does not fully represent variation within the  
115 mouse IG loci. In 2007, Retter et al. sequenced and assembled bacterial artificial chromosome  
116 (BAC) clones spanning the IGH constant region and part of the variable region in the 129S1 mouse  
117 strain(11), which was predicted by restriction fragment length polymorphism (RFLP) to carry a  
118 divergent IGH haplotype compared to C57BL/6(12). They showed that the IGH<sup>A</sup> haplotype of the  
119 129S1 strain is genetically different from the IGH<sup>B</sup> haplotype of the C57BL/6 strain, containing  
120 major germline gene duplications present in the IGH<sup>A</sup> haplotype that are absent in the IGH<sup>B</sup>  
121 haplotype. Though the light chain loci have only been characterized in C57BL/6, early RFLP  
122 experiments reported the existence of 9 IGK haplotypes in commonly used inbred mouse  
123 strains(13), and more recent Sanger sequencing identified significant IGKV polymorphisms in  
124 NOD mice(14, 15). In addition, early isoelectric focusing experiments of mouse light chains  
125 highlighted IGK haplotype differences by showing that SWR/J, C3H/HeJ, DBA/1J, A/J, CBA/J,  
126 and C57BL/6J had identical focusing bands, whereas AKR/J and C58/J had observed  
127 differences(16). More recently, genome-wide high-throughput single nucleotide polymorphism  
128 (SNP) studies have revealed inter-strain diversity across all three IG loci(17, 18).

129

130 The more recent application of high-throughput Adaptive Immune Receptor Repertoire  
131 Sequencing (AIRR-seq) studies has also led to the discovery of extensive variation in the germline  
132 IGHV genes. For example, AIRR-seq studies of C57BL/6 and BALB/c mice demonstrated that

133 the BALB/c IGHV germline set consisted of >160 genes, only 4 of which overlapped with those  
134 found in C57BL/6. In a subsequent study of 5 additional inbred strains, including 4 wild-derived  
135 strains representing diverse sub-species origins, we observed significant inter-strain variation in  
136 IGHV germline sequences, and catalogued 247 germline alleles unaccounted for in existing  
137 reference databases(19). However, despite evidence of potentially similar levels of diversity within  
138 the IGKV and IGLV coding regions, these loci have not been comprehensively explored across  
139 inbred strains.

140

141 In this study, to better understand mouse light chain germline diversity, we conducted  
142 AIRR-seq analysis and germline inference in 18 different inbred mouse strains, again including 4  
143 wild-derived strains from diverse sub-species origins, as well as an additional 14 strains commonly  
144 used in biomedical research. Consistent with our observations in the IGH locus, we observe  
145 significant germline sequence variation between strains. In addition, inferred IGLV genes across  
146 the classical and wild-derived strains reveal the presence of fewer germline genes in classical  
147 strains than wild-derived strains, which may result from the breeding history of classical laboratory  
148 mice. This level of germline diversity is unexplored in the study of immune phenotypes and  
149 unaccounted for in existing gene databases. Despite the diversity observed, we uncover evidence  
150 for the presence of shared germline IGKV/LV gene sets and haplotypes among subgroups of  
151 classical laboratory strains, indicating that the light chain loci reflect shared sub-species origins.

152



153

154

155

156

157

158

159

160

161

162

163

164

165

166

167

168

169

## 170 **Materials and Methods**

171

### 172 **AIRR-seq Library Preparation and Sequencing**

173

174 Whole dissected spleens, preserved in RNAlater (ThermoFisher, Cat. No. AM7020;  
175 Waltham, MA, USA), were obtained from female mice from Jackson Laboratories (Bar Harbor,  
176 ME, USA; <https://www.jax.org>) for eighteen inbred strains [BALB/cByJ (Jax stock #001026), n =  
177 1; NOR/LtJ (Jax stock #002050), n = 1; 129S1/SvImJ (Jax stock #002448), n = 1; MRL/MpJ (Jax  
178 stock #000486), n = 1; A/J (Jax stock #000646), n = 1; AKR/J (Jax stock #000648), n = 1; CBA/J  
179 (Jax stock #000656), n = 1; C3H/HeJ (Jax stock #000659), n = 1; C57BL/6J (Jax stock #000664),  
180 n = 1; DBA/1J (Jax stock #000670), n = 1; DBA/2J (Jax stock #000671), n = 1; NZB/B1NJ (Jax  
181 stock #000684), n = 1; SJL/J (Jax stock #000686), n = 1; CAST/EiJ (Jax stock #000928), n = 1;  
182 NOD/ShiLtJ (Jax stock #001976), n = 1; LEWES/EiJ (Jax stock #002798), n = 1; MSM/MsJ (Jax  
183 stock #003719), n = 1; PWD/PhJ (Jax stock #004660), n = 1].

184

185 We extracted total RNA from 30 mg of spleen tissue using the RNeasy Mini kit (Qiagen,  
186 Cat. No. 74104; Germantown, MD, USA). For each sample, IGK and IGL 5'RACE AIRR-seq  
187 libraries were generated using the SMARTer Mouse BCR Profiling Kit (Takara Bio, Cat. No.  
188 634422; Mountain View, CA, USA), following the manufacturer's instructions. Individual indexed  
189 IGK and IGL AIRR-seq libraries were assessed using the Agilent 2100 Bioanalyzer High  
190 Sensitivity DNA Assay Kit (Agilent, Cat. No. 5067-4626) and the ThermoFisher Qubit 3.0  
191 Fluorometer dsDNA High Sensitivity Assay Kit (ThermoFisher, Cat. No. Q32851). Libraries were  
192 pooled to 10 nM and sequenced three times on the Illumina MiSeq platform using the 600-cycle

193 MiSeq Reagent Kit v3 (2x300 bp, paired-end; Illumina, Cat. No. MS-102-3003); per sample read  
194 depth is provided in Table 1.

195

## 196 **Data Processing and Germline Gene Inference**

197

198 IgDiscover v0.12(20) was used to construct a germline IGK database for each strain. We  
199 combined FASTQ reads from each MiSeq run and processed using IgDiscover v0.12(20) using  
200 the following parameters: (1) "barcode\_consensus" set to false since samples did not have  
201 barcodes; (2) "race\_g" set to "true" to account for the run of G nucleotides present at the start of  
202 the sequence; (3) "stranded" set to "true" since the forward primer was always at the 5' end of the  
203 sequence; (4) "limit" set to false to process all reads; (5) "merge\_program" set to flash; and (6)  
204 "ignore\_j" set to "true" to ignore whether a joining (J) gene had been assigned to an inferred IGKV  
205 or IGLV gene. We used IGKV and IGKJ mouse sequences downloaded from the  
206 ImMunoGeneTics Information System (IMGT) (downloaded August 2021) as the starting  
207 database for IGKV inference.

208

209 Germline IGLV sequences were manually inferred using our previously established  
210 procedure(19). Briefly, IGL sequences were processed using the Immcantation Pipeline(21, 22)  
211 with the IMGT IGL gene database serving as the starting IgBLAST(23) database for germline  
212 gene/allele assignment. First, IGL primer sequences (IGLV1 5'-  
213 AGCTCTTCAGAGGAAGGTGG-3'; IGLC\_var1 5'-AGCTCTTCAGGGGAAGGTGG-3';  
214 IGLC2 5'-AGCTCCTCAGAGGAAGGTGG-3'; IGLC3 5'-AGCTCCTCAGGGGAAGGTGG-  
215 3') were identified using maskPrimers align. Since primer sequences were not provided with the

216 SMARTer Mouse BCR Profiling Kit, we manually determined the primer sequences by  
217 performing a multiple sequence alignment of the first 30 base pairs of the Illumina R1 reads. Next,  
218 read pairs were assembled using `assemblePairs align`, then duplicate reads were collapsed using  
219 `collapseSeq`, with the duplicate count of each collapsed sequence recorded as "dupcount".  
220 Downstream processing required that all sequences have a dupcount  $\geq 2$ . Initial assignments to  
221 germline IGLV and IGLJ genes were performed using `IgBLAST`, with the resulting output parsed  
222 with `Change-O MakeDb`. Clones were identified by `defineClones`, with the clonal thresholds  
223 determined independently for each strain using `distToNearest` function in `SHazaM`(22, 24). Next,  
224 clones were clustered based on IGLV gene assignment and the percent identity to the nearest  
225 mm10 reference sequence. Finally, we determined consensus IGLV gene sequences using `CD-`  
226 `HIT (cd-hit-est v4.6.8)`(25), requiring that a given cluster sequence be represented by at least 0.1%  
227 of the total number of clones identified per strain. This process was repeated across all strains to  
228 create a unique inferred germline IGLV gene set for each strain.

229  
230 We validated our inferred IGKV and IGLV germline sequences using `TIgGER`(22, 26).  
231 Briefly, Presto-processed reads were input into `IgBlast`(23) and `Change-O`(22), with our inferred  
232 germline IGKV and IGLV sequences as the starting gene database for `IgBLAST`(23) alignment.  
233 Upon generation of a `Change-O` table for each strain, the `inferGenotype` function of `TIgGER` was  
234 performed, and sequences were considered validated if they were successfully identified.

235

## 236 **IGKJ and IGLJ Germline Gene Inference**

237

238 J genes were analyzed independently of V genes for IGK and IGL germline repertoires.  
239 First, IgBLAST(23) was run on all sequences using the IMGT germline gene database (release  
240 202209-1; 28 February 2022) for IGK and IGL, and we passed the resulting IgBLAST output  
241 tables to Change-O. Then, we manually inspected Change-O tables for frequently occurring  
242 sequences in the J calls that were not exact sub-sequences of the IMGT reference J alleles.  
243 Sequences present in a strain at a rate  $> 1\%$  were added to a new J gene reference database that  
244 included novel J sequences and IMGT database J sequences. We then re-ran IgBLAST and  
245 Change-O's MakeDb function with the new reference J gene set and inspected MakeDb output to  
246 ensure that no valid reads failed the pipeline due to missing J reference alleles. Lastly, we  
247 validated our candidate novel J alleles using OGRDBstats(27).

248

## 249 **Database And Inter-Strain Comparisons of Germline Gene Sets**

250

251 We compared our inferred germline sequences to the existing IMGT gene database using  
252 IMGT HighV-QUEST v1.8.3 (7 May 2021)(28, 29). We also compared inferred IGKV and IGLV  
253 germline gene sets between strains in a pairwise fashion using BLAT(30, 31). For each inter-strain  
254 comparison, the germline set of the strain with the smallest number of inferred sequences was used  
255 as the "query". For each sequence in the query set, the best match from the alternate strain was  
256 assigned based on percent identity and match alignment length, requiring a minimum alignment  
257 length of 275 bp. The mean sequence identity of the best matches for all sequences in the query  
258 set was computed and used to express the average similarity of sequences between two strains.  
259 The mean similarity between inferred sequences across all strains in relation to their predicted SNP  
260 haplotypes was visualized using the Pheatmap(32) package in R.

261

## 262 **SNP-Predicted Haplotype and Sub-Species Origin Analysis**

263

264 Each strain's SNP-predicted haplotype and sub-species origin were determined using  
265 whole-genome SNP data from the Mouse Phylogeny Viewer(33). Data were viewed and  
266 downloaded for mouse IGK and IGL loci (IGK, chr6:67449994-70709994; IGL, chr16:19055093-  
267 19265093) to determine SNP-predicted haplotypes and sub-species origin. We performed a  
268 multiple sequence alignment of genotypes at SNP positions spanning the IGK and IGL loci to  
269 generate a SNP-predicted haplotype for each strain. We then used the multiple sequence alignment  
270 to construct a neighbor-joining phylogenetic tree to cluster strains into different shared haplotypes  
271 (Figure 1). To ensure that the SNP-predicted haplotypes were assigned accurately, we required  
272 genotypes to be present for all strains at all positions for which there was SNP data. For example,  
273 if the SNP array produced an N for a position in a given strain, then the position was masked across  
274 all strains in the multiple sequence alignment to prevent the Ns from contributing to the topology  
275 of the neighbor-joining phylogenetic tree, and thus biasing the haplotype groupings. In total, we  
276 masked 23% (74/324) of SNP positions for IGK and 39% (12/31) for IGL. Haplotype groups were  
277 assigned to strains that clustered together in the phylogenetic trees, with groupings annotated in  
278 Table 1 and Figure 1.

279

## 280 **Evolutionary Analysis of IGH, IGK, and IGL V Genes in Wild-Derived Mouse Strains**

281

282 For each strain and locus, the divergence of V genes was analyzed. First, V genes  
283 corresponding to the same strain and locus were translated into amino acids, and sequences

284 translated with stop codons were discarded. Then, for each V gene, pairwise alignments against  
285 all other V genes were computed and the average percent identity was computed. For the three  
286 loci, phylogenetic trees were computed on amino acid sequences of V genes using the Clustal  
287 Omega tool(34). To analyze evolutionary relations between four wild-derived mouse strains,  
288 subtrees of the IGHV, IGKV, and IGLV trees with height at most  $0.1L$  were extracted, where  $L$  is  
289 the height of the tree. Each subtree extracted this way represented a group of V genes from the  
290 same single family. For each subtree, the consensus sequence of corresponding genes was derived,  
291 and, for each V gene from the subtree, its divergence from the consensus was computed. The  
292 divergence was defined as the fraction of non-matching positions in the alignment between the  
293 gene and the consensus.

294

295

296

297

298

299

300

301

302

303

## 304 **Results**

305

### 306 **Selecting Mouse Strains to Represent Diverse Sub-Species Origins and IGK/L Haplotypes**

307

308       The mouse has been used in genetic studies, random mutagenesis experiments, the  
309 development of inbred lines, and the direct engineering of the genome through knock-in, knockout,  
310 and transgenic techniques for over one hundred years(35). As a result, many mouse strains are  
311 available for use in biomedical research. For example, C57BL/6, the most common and best-  
312 studied classical laboratory strain today(36), has been a popular model organism in immunology,  
313 with various knockout lines available and its genome sequenced by the Mouse Genome  
314 Sequencing Consortium(35). Another common strain, BALB/c, served as an early model organism  
315 used to induce plasmacytomas and monoclonal antibody production(37, 38). Other strains, such  
316 as NOD/ShiLtJ, SJL/J, and MRL/MpJ, are used to model autoimmune disorders such as  
317 autoimmune type 1 diabetes, experimental autoimmune encephalomyelitis, and systemic lupus  
318 erythematosus and Sjogren's syndrome(39, 40). In addition, wild-derived mouse strains are often  
319 used to incorporate wild mouse genetics into laboratory strains by creating F1 hybrids(41). Given  
320 the diverse breeding history of these strains(42–45) we expected the genetic diversity of the IG  
321 light chains to resemble the diversity observed in the IG heavy chain(19, 46).

322

323       To select strains that captured IG light chain germline diversity, we examined the predicted  
324 sub-species origins and SNP-based haplotypes of the mouse IG light chain loci(17, 18) (Table 1,  
325 Figure 1) across classical and wild-derived strains. We leveraged early studies that reported the  
326 existence of alternate IGK and IGL haplotypes across mouse strains(13, 47–50), as well as



327 genome-wide SNP data available for 62 wild-derived laboratory strains and 100 classical  
328 strains(18). To account for the different *Mus* subspecies, we included strains with IG loci predicted  
329 to represent the three major *Mus* subspecies, *M. castaneus*, *M. domesticus*, and *M. musculus*, which  
330 form the genetic background for classical inbred laboratory mouse strains(51, 52). In addition, we  
331 chose CAST/EiJ, LEWES/EiJ, MSM/MsJ, and PWD/PhJ to represent wild-derived mouse strains,  
332 in which we have previously inferred germline IGHV, IGHD, and IGHJ genes(19). In total, we  
333 sequenced the IGK and IGL repertoires of 18 different mouse strains representing three SNP-  
334 predicted IGK haplotype groups and five SNP-predicted IGL haplotype groups(33) (Figure 1).

335

### 336 **Mouse Light Chain Variable Genes Are Underrepresented In Germline Gene Databases**

337

338 First, we inferred germline light chain repertoires across our selected mouse strains (Figure  
339 2). We used IgDiscover to infer each strain's IGKV germline sequences and our previous clustering  
340 method(19) to infer IGLV germline sequences. To benchmark the performance of our inference  
341 approach, we first assessed how well our C57BL/6J inferences compared to known IMGT  
342 C57BL/6 IGKV and IGLV germline sequences. 91/91 IGKV inferred sequences matched IMGT  
343 C57BL/6 IGKV germline sequences with 100% identity. Additionally, our three C57BL/6J IGLV  
344 inferences were 100% identical to IMGT IGLV sequences. However, since the three IMGT IGLV  
345 sequences that matched our inferences were derived from BALB/c(5), we also compared these  
346 three inferences to the mouse reference genome, mm10, derived from C57BL/6. The three IGLV  
347 C57BL6/J inferences matched mm10 with 100% identity.

348

349           Across the 18 mouse strains, 1582 IGKV and 63 IGLV sequences were inferred,  
350 representing 459 and 22 unique IGKV and IGLV sequences, respectively (Supplemental Table 1).  
351 The sizes of inferred IGKV germline gene sets varied across strains, from 105 in NZB/BINJ to 62  
352 in NOD/ShiLtJ (Figure 3A). In contrast, the numbers of inferred IGLV germline genes were more  
353 conserved across strains. Three IGLV germline sequences were inferred for all classical laboratory  
354 strains and PWD/PhJ. However, LEWES/EiJ, MSM/MsJ, and CAST/EiJ had > three genes  
355 inferred from their repertoire data (Figure 3B). Inferred IGKV and IGLV germline sequences for  
356 all strains are available on OGRDB(53).

357  
358           Of the 459 and 22 IGKV and IGLV unique sequences inferred across strains, 67.8%  
359 (n=311, IGKV) and 59% (n=13, IGLV) were undocumented in IMGT (Figures 4A, B). A fraction  
360 of these non-IMGT alleles were identified in NCBI GenBank with 100% identity: 12% (n=37) of  
361 IGKV and 8% (n=1) of IGLV (Figures 4C, D). The number of undocumented (non-IMGT) alleles  
362 varied by strain (Figures 3A, B). For IGKV, while a significant fraction of non-IMGT alleles were  
363 inferred from wild-derived strains, there were several biomedically relevant classical strains in  
364 which the majority of sequences are not curated in IMGT (Figure 3A), likely reflecting divergence  
365 from the C57BL/6 haplotype, as has been previously noted(14). Strains such as NOD/ShiLtJ,  
366 NOR/LtJ, AKR/J, and MRL/MpJ, commonly used to model autoimmune disorders, have poor  
367 IGKV germline representation in IMGT (Figure 3A)(39, 54, 55). Sequence alignment of these  
368 strains' inferred IGKV germline sequences to the IMGT database yielded percent identities  
369 ranging from 100% to 89.61% for IGKV, and 100% to 93.88% for IGLV (Figures 3C, D).  
370 Alignment percent identity was strain-dependent, as we observed significant IGKV sequence  
371 variation for the four wild-derived strains, and AKR/J, MRL/MpJ, NOD/ShiLtJ, NOR/LtJ, and

372 NZB/BINJ. Of all the strains investigated, MSM/MsJ have the fewest IGKV germline sequences  
373 (5/83) documented in IMGT, and CAST/EiJ have the fewest IGLV germline sequences (3/9)  
374 documented in IMGT. Collectively, we observe high levels of diversity currently unaccounted for  
375 in the IMGT gene database.

376

377 IGKJ germline inference across strains revealed a novel IGKJ2 allele, with a single T to C  
378 transition shared between PWD/PhJ and MSM/MsJ (Figure 5A), strains of *M. m. musculus*  
379 subspecific origin, and members of Group A in our IGK SNP-haplotype phylogeny (Figure 1A).  
380 We inferred two novel IGLJ alleles among the wild-derived strains (Figure 5B). A novel IGLJ1  
381 allele was inferred for LEWES/EiJ, and a novel IGLJ2 allele was inferred for MSM/MsJ. Both  
382 novel IGLJ alleles differ from the IMGT reference sequence by a single nucleotide. Interestingly,  
383 we did not infer any IGLJ3 alleles in MSM/MsJ; all MSM/MsJ J gene usage was restricted to  
384 IGLJ1\*01 and the novel IGLJ2 allele. Overall, we found our SNP-haplotype groupings reflected  
385 in the IGKJ and IGLJ allelic variation across strains.

386

### 387 **Inter-Strain IGKV/IGLV Germline Diversity**

388

389 We next considered the extent to which inferred IGKV and IGLV germline sequences were  
390 shared among strains (Figures 6A, B). Across IGKV germline gene sets, the most strain-specific  
391 sequences were observed among the wild-derived strains, CAST/EiJ (n=58), PWD/PhJ (n=57),  
392 MSM/MsJ (n=55), and LEWES/EiJ (n=21), with an additional 19 sequences uniquely common to  
393 PWD/PhJ and MSM/MsJ (Figure 6A). There were fewer unique sequences in each of the classical  
394 laboratory strains. For example, only nine unique sequences were seen in the NOD/ShiLtJ strain,

395 which had the highest number of unique sequences amongst the classical inbred strains. Instead,  
396 we observed large sets of sequences that were identical across many strains (Figure 6A). The most  
397 extensive shared sequence set comprised 27 inferred IGKV germline sequences inferred from 11  
398 different strains (SJL/J, CBA/J, LEWES/EiJ, C57BL/6J, 129S1/SvImJ, C3H/HeJ, BALB/cByJ,  
399 DBA1/J, DBA2/J, A/J, and NZB/BINJ). This degree of allele sharing was suggestive of the  
400 presence of potentially shared haplotypes. We assessed our IGK SNP-Predicted haplotype  
401 phylogenetic tree (Figure 1A) and found all 11 strains in Group C. NZB/BINJ was the only strain  
402 in Group C predicted to have a different sub-specific origin for the IGK locus. The Mouse  
403 Phylogeny Viewer(33) reports a *M. m. domesticus* and *M. m. castaneus* sub-specific origin for the  
404 NZB/BINJ IGK locus, which contrasts the other strains' *M. m. domesticus* IGK locus sub-specific  
405 origin.

406  
407 Another group of strains, NOD/ShiLtJ, NOR/LtJ, MRL/MpJ, and AKR/J, formed a  
408 different cluster with 14 shared IGKV germline sequences (Figure 6A). These four strains fall into  
409 Group B of our SNP-Predicted haplotype phylogenetic tree (Figure 1A) and represent an IGK  
410 locus sub-specific origin of either completely *M. m. castaneus*, or a mixture of *M. m. castaneus*  
411 and *M. m. domesticus*. Finally, PWD/PhJ and MSM/MsJ, both wild-derived strains with a *M. m.*  
412 *musculus* sub-specific origin, were located in the Group A cluster, with 19 unique IGKV sequences  
413 shared between themselves (Figure 6A, Figure 1A). We also examined inter-strain diversity at the  
414 level of IGKV gene family by comparing the number of inferred IGKV sequences for each gene  
415 family across strains (Supplemental Figure 1). Overall, the IGKV4 subfamily was most variable  
416 in size and the most abundant family across strains, whereas IGKV20 was the least abundant and  
417 only inferred in PWD/PhJ, MSM/MsJ, and CAST/EiJ.

418

419           In each of the 14 classical strains, a total of three IGLV sequences were inferred, which is  
420 consistent with the number of genes found in the C57BL/6 mm10 genome(56). These IGLV  
421 inferences were identical across the 14 classical strains (Figure 6B), supporting the predicted sub-  
422 species origins and SNP-Haplotype phylogenetic tree clustering (Figure 1B). In contrast to the  
423 classical strains, additional putative genes were inferred in three of the wild-derived strains,  
424 CAST/EiJ, LEWES/EiJ, and MSM/MsJ, totaling nine, four, and five inferred genes for each strain,  
425 respectively. Phylogenetic analysis of inferred IGLV sequences revealed that inferred genes  
426 unique to CAST/EiJ formed an additional outgroup to all other IGLV1, IGLV2, and IGLV3 gene  
427 sequences characterized in the classical strains (Supplemental Figure 2). In addition to these IGLV  
428 paralogs, the IGLV2 sequences inferred in CAST/EiJ and PWD/PhJ, and the IGLV3 sequences  
429 inferred from CAST/EiJ, PWD/PhJ, and LEWES/EiJ, differed from those characterized in the  
430 classical strains, likely representing allelic variants. Thus, taken together, the majority of IGLV  
431 germline diversity observed in the animals studied here came from wild-derived strains.

432

433           To help validate the relationship between predicted IG haplotypes, sub-species origin, and  
434 the inferred germline sets across strains, we performed all-by-all pairwise comparisons of inferred  
435 IGKV and IGLV sequences across strains to group strains by sequence similarity. We reasoned  
436 that inferred IGKV/IGLV sequences within strains sharing predicted haplotypes would have  
437 higher sequence similarities. We found that mean pairwise sequence similarities varied  
438 considerably. For IGKV, the highest similarity (99.99%) observed was between C3H/HeJ and A/J,  
439 whereas the most divergent comparison was between NOR/LtJ and PWD/PhJ (95.30%). We used  
440 hierarchical clustering to group strains based on mean pairwise similarities, and the results

441 corresponded to the three haplotype groups obtained from our SNP-Haplotype phylogenetic tree  
442 (Figure 7). IGLV inferences were much more conserved across strains. The four IGLV germline  
443 sequences inferred for LEWES/EiJ are consistent with Potter et al., who reported that wild *Mus*  
444 *musculus domesticus* had at least three IGLV genes(57).

445

#### 446 **Diversification of IGHV, IGKV, and IGLV Sequences Among Wild-Derived Mouse Strains**

447

448 Gene evolution through duplication and diversification events have helped shape the  
449 diversity of the mouse immunoglobulin genes. In mice and humans, light chain gene  
450 rearrangement begins on the kappa chain, but it follows heavy chain rearrangement. If this initial  
451 rearrangement is auto-reactive, then the gene organization of the kappa chain locus permits  
452 additional gene rearrangements through a process known as receptor editing to form a  
453 rearrangement that is not auto-reactive(3). While both the heavy and kappa chain repertoires have  
454 many V genes that have evolved through gene duplications, deletions, and sequence divergence(6,  
455 58), the kappa chain repertoire contains less inherent germline diversity than the heavy chain(3).  
456 It has been hypothesized that the reduced germline diversity of the kappa chain repertoire has  
457 evolved to limit self-reactivity, while the heavy chain repertoire has evolved to increase diversity.  
458 Support for this hypothesis stems mainly from human AIRR-seq data, in which there is some  
459 evidence that there is less allelic diversity in IGKV compared to IGHV(3). Others have also  
460 suggested that the patterns of diversification and divergence are potentially different between  
461 heavy and light chain immunoglobulin genes. For example, Schwartz et al. analyzed amino acid  
462 sequences for human germline heavy and light chain genes and concluded that heavy and lambda  
463 V genes had higher diversities compared to kappa V genes(59). Our AIRR-seq dataset provides us

464 with the opportunity to compare diversification and divergence patterns between germline heavy  
465 and light chain gene sets across multiple mouse strains representing diverse mouse subspecies  
466 origins. Therefore, we hypothesized that the mouse kappa chain antibody repertoire would have  
467 decreased diversity in germline V genes compared to the heavy chain antibody repertoire to  
468 minimize potential auto-reactivity.

469

470 One metric that can be used to compare germline sequence evolution of genes is the edit  
471 distance between two sequences, defined as the minimal number of mutations separating the two  
472 sequences(60). In 2019, we inferred germline IGHV genes among wild-derived mouse strains  
473 representing the major *Mus* sub-species origins(19). With the additional germline IGKV and IGLV  
474 genes from the same wild-derived strains, we compared germline variable gene sequence  
475 divergence rates for the IGH, IGK, and IGL loci of the wild-derived strains using phylogenetic  
476 trees constructed from multiple sequence alignments of germline IGHV, IGKV, and IGLV  
477 sequences. IGHV genes from all strains have lower average percent identities compared to IGKV  
478 and IGLV genes thus indicating that heavy chain V genes evolve faster compared to light chain V  
479 genes in mice (Figure 8A). Figure 8B shows that the pattern holds true for pairs V genes collected  
480 from pairs of strains. This data suggests that the mouse IGH locus contains greater inherent  
481 germline sequence diversity than the IGK locus despite having a similar number of germline genes.  
482 The resulting phylogenetic trees revealed that, as expected, V genes formed groups according to  
483 their families (Figure 8C). The only exception in the IGHV tree was IGHV12 family represented  
484 by three genes that did not form a single subtree but rather were broken into two groups, one of  
485 which was formed by genes IGHV12-2\_1 (LEWES/EiJ) and IGHV12-1\_1 (MSM/MsJ) and  
486 IGHV3 family and other one is formed by IGHV12-1\_1 (LEWES/EiJ) gene and IGHV2 and

487 IGHV8 families. IGKV16 family represents a similar exception in the IGKV tree: five IGKV16  
488 genes did not form a single subtree and were found in subtrees corresponding to families IGKV11,  
489 IGKV13, IGKV15, IGKV17, IGKV19, and IGKV20. Finally, Figure 8D shows that, on average,  
490 the LEWES/EiJ strain has the highest divergence from the consensus. A similar analysis of IGKV  
491 genes revealed the same pattern (Figure 8E). These observations suggest that the LEWES/EiJ  
492 strain has branched from the common ancestor before three other strains (CAST/EiJ, MSM/MsJ,  
493 and PWD/PhJ) and accumulated more mutations in immunoglobulin V genes.

494

495

496

497

498

499

500

501

502



503

504

505

506

507

508

509

510

511

512

513

514

515

516

517

518

519

## 520 Discussion

521  
522 This study was performed as a follow-up to our 2019 study in which we inferred IGHV,  
523 IGHD, and IGHJ genes of wild-derived strains representing each of the three major subspecies of  
524 the house mouse (CAST/EiJ: *M. m. castaneus*; LEWES/EiJ: *M. m. domesticus*; PWD/PhJ: *M. m.*  
525 *musculus*) and the *M. m. musculus*/*M. m. castaneus* hybrid strain MSM/MsJ. Overall, we found  
526 little overlap in germline IGHV repertoires among the wild-derived mouse strains and could not  
527 attribute all of the repertoire differences observed to variation in sub-specific origin. For example,  
528 while apparently *musculus*-derived strains did share IGHV sequences, many of these sequences  
529 were unique to each strain. Most importantly, the inferences were largely absent in existing gene  
530 databases such as IMGT. The diversity of germline IGHV sequences led us to hypothesize that  
531 extensive germline light chain variable genes would also be present. Therefore, in addition to  
532 sequencing the light chain variable genes for the wild-derived strains sequenced in 2019, we  
533 expanded the number of strains to include various strains used across the biomedical sciences that  
534 represented different SNP-predicted haplotypes for the light chain loci. The strains encompassed  
535 a variety of disease models in the biomedical sciences, including those used for the study of  
536 infection, autoimmunity, diabetes, cancer, and regeneration(54, 61).

537  
538 One of the most fundamental tasks in analyzing AIRR-seq data is V, D, and J gene  
539 assignment, which is accomplished by performing alignment of AIRR-seq reads to germline  
540 sequences from a gene database. IMGT is the most commonly used database that curates the  
541 germline repertoires used for sequence alignment in AIRR-seq analysis. When comparing our  
542 inferred light chain germline sequences to those curated in IMGT, we observed that many strains'

543 IGKV germline sequences were absent from IMGT, and few undocumented sequences were found  
544 in NCBI/GenBank (Figures 3, 4). In contrast, the majority of genes characterized in IGLV among  
545 classical strains are curated in IMGT, including previously described wild-derived IGLV4  
546 sequences detected in CAST/EiJ(62).

547

548         Critically, many of the inferred germline genes found to be absent from IMGT showed  
549 evidence of significant divergence from the closest curated allele in the database. For example,  
550 59% (185/311) of non-IMGT IGKV sequences, and 62% (8/13) of non-IMGT IGLV sequences,  
551 had <98% identity to their nearest IMGT IGKV sequence. Thus, we would expect that these  
552 missing data could greatly impact the accuracy of germline gene assignment and SHM estimation  
553 in studies using these strains. Given that the IGK locus is similarly complex as the IGH locus, with  
554 different combinations of SNP-predicted sub-species origins and haplotypes, the IGK locus likely  
555 contains genetic variation similar to that observed in IGH between BALB/c, C57BL/6, and  
556 129S1(11, 46). Our inferred IGKV germline sequences supported these three distinct haplotype  
557 clusters (Figures 1A, 6A, and 7). For example, 11 strains shared 27 IGKV germline sequences,  
558 and all 11 strains belonged to Group C in the IGK SNP-Predicted haplotype phylogeny (Figure  
559 1A). We compared these strains to the historic IGK haplotypes identified using RFLP and observed  
560 that 9 of the 11 strains were previously designated the historical IGK<sup>A</sup> haplotype(48). We also  
561 observed 14 IGKV sequences shared among 4 strains in our dataset belonging to Group B (Figure  
562 1A), containing the historical IGK<sup>B</sup> haplotype(48). Though CAST/EiJ does not share the 14 unique  
563 IGKV sequences with NOD/ShiLtJ, NOR/LtJ, MRL/MpJ, and AKR/J, the SNP-phylogeny data,  
564 and additional shared sequences between these strains, suggest that CAST/EiJ does indeed belong  
565 in haplotype Group B. Similar to the historic IGH<sup>A</sup> and IGH<sup>B</sup> haplotypes(6, 11, 63, 64), our results

566 suggest that the IGK loci of strains carrying the IGK<sup>B</sup> haplotype are similar to one another and  
567 different from the loci of strains carrying the IGK<sup>A</sup> haplotype.

568

569 Strain clustering according to the sub-species origin was also apparent after performing all-  
570 by-all pairwise sequence comparisons (Figure 7) and validated our SNP-phylogeny groupings. Of  
571 note, the 5 strains in Group B (AKR/J, MRL/MpJ, NOD/ShiLtJ, NOR/LtJ, and CAST/EiJ)  
572 exhibited significant sequence divergence from the IMGT alleles (Figure 3D), highlighting the  
573 lack of representation for strains sharing this IGK haplotype. However, like the IGH locus, only a  
574 single complete IGK reference is available based on C57BL/6(10), illustrating an IGK haplotype  
575 not shared by all strains and only representative of a single sub-species origin.

576

577 Our cohort contained 5 SNP-predicted IGL haplotypes (Figure 1B); however, only one  
578 haplotype had representation by more than one strain. All wild-derived strains, MSM/MsJ,  
579 PWD/PhJ, CAST/EiJ, and LEWES/EiJ were clustered into single-strain clades according to the  
580 SNP-predicted haplotype, while the 14 remaining classical laboratory strains clustered into a single  
581 haplotype. Our data supported the predicted haplotype clustering, with each wild-derived strain  
582 containing at least one unique IGLV allele not shared with other strains and classical laboratory  
583 strains sharing IGLV alleles amongst each other (Figure 6B). Of note, we did infer more than the  
584 three canonical IGLV germline sequences in CAST/EiJ, MSM/MsJ, and LEWES/EiJ, which was  
585 expected based on previous data hypothesizing the existence of additional IGLV genes in wild-  
586 derived strains(57). A total of 13 novel sequences were identified among the wild-derived strains,  
587 with an allelic variant of IGLV2\*02 shared between CAST/EiJ and PWD/PhJ. Inferred IGLV

588 germline repertoires in classical laboratory strains were more conserved and composed of three  
589 IGLV genes.

590

591         Although expressed lambda chain genes account for only 3 to 5% of total serum IG, little  
592 is known regarding how the mouse lambda locus reduced in size(57). Furthermore, though gene  
593 deletion events could cause a reduced IG lambda locus in mice, it is unclear where it occurred in  
594 mouse phylogenetic history. The rat IG loci, similar to the mouse IG loci, have not been  
595 extensively explored and characterized across strains. Reports suggest that the IGL locus in rat  
596 only contains a single IGLV gene and two IGLC genes making the rat IGL locus even smaller than  
597 mouse(65). If we consider the rat and mouse to be distant relatives, this presents two possible  
598 scenarios that may have occurred during rat and mouse evolution. Either the mouse IGL locus  
599 expanded through duplications, or the rat IGL locus decreased in size through deletions.

600

601         Overall, in conjunction with other published studies, the data presented here demonstrate  
602 that the germline heavy and light chain repertoires are not conserved across biomedically relevant  
603 mouse strains(19, 46). Our phylogenetic analysis of heavy and kappa germline inferences for wild-  
604 derived strains revealed sequence divergence differences among the four major *Mus* sub-species  
605 origins. Furthermore, it showed that the heavy chain locus contained more inherent germline  
606 sequence variability than the kappa chain locus, which had previously been hypothesized but not  
607 explored across multiple strains representing different subspecies origins. If the function of the  
608 kappa chain locus is to limit inherent germline diversity to prevent B-cell receptor auto-reactivity  
609 as hypothesized, then it is crucial to properly characterize IGK haplotypes for mouse strains used  
610 in autoimmune research. In humans, we know that the light chain repertoire in autoimmune

611 diseases like Myasthenia Gravis can become perturbed and result in errors during receptor editing  
612 during B-cell development(66). Although AIRR-seq data can help build germline gene databases  
613 for various mouse strains, this data lacks critical information on noncoding elements and gene  
614 positions that could elucidate gene expression differences between strains. Additional IG genome  
615 assemblies are required that reflect the haplotype and sub-specific diversity that we have presented  
616 in the mouse IG loci.

617

618

619

620

621

622

## 623 REFERENCES

624

625 1. Kenneth, M., and W. Casey. 2016. *Janeway's immunobiology*,. Garland science.

626 2. Rajewsky, K., I. Forster, and A. Cumano. 1987. Evolutionary and somatic selection of the  
627 antibody repertoire in the mouse. *Science* 238: 1088–1094.

628 3. Collins, A. M., and C. T. Watson. 2018. Immunoglobulin Light Chain Gene Rearrangements,  
629 Receptor Editing and the Development of a Self-Tolerant Antibody Repertoire. *Frontiers in*  
630 *Immunology* 9: 2249.

- 631 4. Herold, E. M., C. John, B. Weber, S. Kremser, J. Eras, C. Berner, S. Deubler, M. Zacharias,  
632 and J. Buchner. 2017. Determinants of the assembly and function of antibody variable domains.  
633 *Sci Rep-uk* 7: 12276.
- 634 5. Lefranc, M.-P. 2001. IMGT, the international ImMunoGeneTics database. *Nucleic Acids Res*  
635 29: 207–209.
- 636 6. Tutter, A., and R. Riblet. 1988. Evolution of the immunoglobulin heavy chain variable region  
637 (Igh-V) locus in the genus *Mus*. *Immunogenetics* 30: 315.
- 638 7. Johnston, C. M., A. L. Wood, D. J. Bolland, and A. E. Corcoran. 2006. Complete Sequence  
639 Assembly and Characterization of the C57BL/6 Mouse Ig Heavy Chain V Region. *J Immunol*  
640 176: 4221–4234.
- 641 8. Jackson, K. J., J. T. Kos, W. Lees, W. S. Gibson, M. L. Smith, A. Peres, G. Yaari, M.  
642 Corcoran, C. E. Busse, M. Ohlin, C. T. Watson, and A. M. Collins. 2022. A BALB/c IGHV  
643 Reference Set, defined by haplotype analysis of long-read VDJ-C sequences from F1 (BALB/c /  
644 C57BL/6) mice. *Biorxiv* 2022.02.28.482396.
- 645 9. Aoki-Ota, M., A. Torkamani, T. Ota, N. Schork, and D. Nemazee. 2012. Skewed Primary Igh  
646 Repertoire and V–J Joining in C57BL/6 Mice: Implications for Recombination Accessibility and  
647 Receptor Editing. *J Immunol* 188: 2305–2315.
- 648 10. Brekke, K. M., and W. T. Garrard. 2004. Assembly and analysis of the mouse  
649 immunoglobulin kappa gene sequence. *Immunogenetics* 56: 490–505.

- 650 11. Retter, I., C. Chevillard, M. Scharfe, A. Conrad, M. Hafner, T.-H. Im, M. Ludewig, G.  
651 Nordsiek, S. Severitt, S. Thies, A. Mauhar, H. Blöcker, W. Müller, and R. Riblet. 2007.  
652 Sequence and Characterization of the Ig Heavy Chain Constant and Partial Variable Region of  
653 the Mouse Strain 129S1. *The Journal of Immunology* 179: 2419–2427.
- 654 12. Brodeur, P. H., and R. Riblet. 1984. The immunoglobulin heavy chain variable region (Igh-  
655 V) locus in the mouse. I. One hundred Igh-V genes comprise seven families of homologous  
656 genes. *Eur J Immunol* 14: 922–930.
- 657 13. Kofler, R., S. Geley, H. Kofler, and A. Helmberg. 1992. Mouse Variable-Region Gene  
658 Families: Complexity, Polymorphism and Use in non-Autoimmune Responses. *Immunol Rev*  
659 128: 5–21.
- 660 14. Henry, R. A., P. L. Kendall, E. J. Woodward, C. Hulbert, and J. W. Thomas. 2010. V $\kappa$   
661 polymorphisms in NOD mice are spread throughout the entire immunoglobulin kappa locus and  
662 are shared by other autoimmune strains. *Immunogenetics* 62: 507–520.
- 663 15. Woodward, E. J., and J. W. Thomas. 2005. Multiple Germline  $\kappa$  Light Chains Generate Anti-  
664 Insulin B Cells in Nonobese Diabetic Mice. *J Immunol* 175: 1073–1079.
- 665 16. Gibson, D. 1976. Genetic polymorphism of mouse immunoglobulin light chains revealed by  
666 isoelectric focusing. *J Exp Medicine* 144: 298–303.
- 667 17. Yang, H., T. A. Bell, G. A. Churchill, and F. P.-M. de Villena. 2007. On the subspecific  
668 origin of the laboratory mouse. *Nat Genet* 39: 1100–1107.



- 669 18. Yang, H., J. R. Wang, J. P. Didion, R. J. Buus, T. A. Bell, C. E. Welsh, F. Bonhomme, A. H.-  
670 T. Yu, M. W. Nachman, J. Pialek, P. Tucker, P. Boursot, L. McMillan, G. A. Churchill, and F.  
671 P.-M. de Villena. 2011. Subspecific origin and haplotype diversity in the laboratory mouse. *Nat*  
672 *Genet* 43: 648.
- 673 19. Watson, C. T., J. T. Kos, W. S. Gibson, L. Newman, G. Deikus, C. E. Busse, M. L. Smith, K.  
674 J. Jackson, and A. M. Collins. 2019. A comparison of immunoglobulin IGHV, IGHD and IGHJ  
675 genes in wild-derived and classical inbred mouse strains. *Immunol Cell Biol* .
- 676 20. Corcoran, M. M., G. E. Phad, N. V. Bernat, C. Stahl-Hennig, N. Sumida, M. A. A. Persson,  
677 M. Martin, and G. B. K. Hedestam. 2016. Production of individualized V gene databases reveals  
678 high levels of immunoglobulin genetic diversity. *Nature Communications* 7: 13642.
- 679 21. Heiden, J. A. V., G. Yaari, M. Uduman, J. N. H. Stern, K. C. O'Connor, D. A. Hafler, F.  
680 Vigneault, and S. H. Kleinstei. 2014. pRESTO: a toolkit for processing high-throughput  
681 sequencing raw reads of lymphocyte receptor repertoires. *Bioinformatics* 30: 1930–1932.
- 682 22. Gupta, N. T., J. A. V. Heiden, M. Uduman, D. Gadala-Maria, G. Yaari, and S. H. Kleinstei.  
683 2015. Change-O: a toolkit for analyzing large-scale B cell immunoglobulin repertoire sequencing  
684 data. *Bioinformatics* 31: 3356–3358.
- 685 23. Ye, J., N. Ma, T. L. Madden, and J. M. Ostell. 2013. IgBLAST: an immunoglobulin variable  
686 domain sequence analysis tool. *Nucleic Acids Res* 41: W34–W40.
- 687 24. Yaari, G., J. A. Heiden, M. Uduman, D. Gadala-Maria, N. Gupta, J. N. Stern, K. C.  
688 O'Connor, D. A. Hafler, U. Laserson, F. Vigneault, and S. H. Kleinstei. 2013. Models of

- 689 Somatic Hypermutation Targeting and Substitution Based on Synonymous Mutations from High-  
690 Throughput Immunoglobulin Sequencing Data. *Frontiers in Immunology* 4: 358.
- 691 25. Huang, Y., B. Niu, Y. Gao, L. Fu, and W. Li. 2010. CD-HIT Suite: a web server for  
692 clustering and comparing biological sequences. *Bioinformatics* 26: 680–682.
- 693 26. Gadala-Maria, D., G. Yaari, M. Uduman, and S. H. Kleinstein. 2015. Automated analysis of  
694 high-throughput B-cell sequencing data reveals a high frequency of novel immunoglobulin V  
695 gene segment alleles. *Proc National Acad Sci* 112: E862–E870.
- 696 27. Lees, W. *Standardised reporting of genotype statistics as used by OGRDB*.
- 697 28. Alamyar, E., P. Duroux, M.-P. Lefranc, and V. Giudicelli. 2012. Immunogenetics, Methods  
698 and Applications in Clinical Practice. *Methods Mol Biology* 882: 569–604.
- 699 29. Aouinti, S., D. Malouche, V. Giudicelli, S. Kossida, and M.-P. Lefranc. 2015. IMGT/HighV-  
700 QUEST Statistical Significance of IMGT Clonotype (AA) Diversity per Gene for Standardized  
701 Comparisons of Next Generation Sequencing Immunoprofiles of Immunoglobulins and T Cell  
702 Receptors. *Plos One* 10: e0142353.
- 703 30. Schneider, V. A., T. Graves-Lindsay, K. Howe, N. Bouk, H.-C. Chen, P. A. Kitts, T. D.  
704 Murphy, K. D. Pruitt, F. Thibaud-Nissen, D. Albracht, R. S. Fulton, M. Kremitzki, V. Magrini,  
705 C. Markovic, S. McGrath, K. M. Steinberg, K. Auger, W. Chow, J. Collins, G. Harden, T.  
706 Hubbard, S. Pelan, J. T. Simpson, G. Threadgold, J. Torrance, J. Wood, L. Clarke, S. Koren, M.  
707 Boitano, H. Li, C.-S. Chin, A. M. Phillippy, R. Durbin, R. K. Wilson, P. Flicek, and D. M.

- 708 Church. 2016. Evaluation of GRCh38 and de novo haploid genome assemblies demonstrates the  
709 enduring quality of the reference assembly. *Biorxiv* 072116.
- 710 31. Kent, W. J. 2002. BLAT—The BLAST-Like Alignment Tool. *Genome Res* 12: 656–664.
- 711 32. Raivo, K., and K. Raivo Maintainer. *Package ‘pheatmap.’*
- 712 33. Wang, J. R., F. P.-M. de Villena, and L. McMillan. 2012. Comparative analysis and  
713 visualization of multiple collinear genomes. *Bmc Bioinformatics* 13: S13.
- 714 34. Sievers, F., A. Wilm, D. Dineen, T. J. Gibson, K. Karplus, W. Li, R. Lopez, H. McWilliam,  
715 M. Remmert, J. Söding, J. D. Thompson, and D. G. Higgins. 2011. Fast, scalable generation of  
716 high-quality protein multiple sequence alignments using Clustal Omega. *Mol Syst Biol* 7: 539–  
717 539.
- 718 35. Consortium, M. G. S. 2002. Initial sequencing and comparative analysis of the mouse  
719 genome. *Nature* 420: 520.
- 720 36. Sarsani, V. K., N. Raghupathy, I. T. Fiddes, J. Armstrong, F. Thibaud-Nissen, O. Zinder, M.  
721 Bolisetty, K. Howe, D. Hinerfeld, X. Ruan, L. Rowe, M. Barter, G. Ananda, B. Paten, G. M.  
722 Weinstock, G. A. Churchill, M. V. Wiles, V. A. Schneider, A. Srivastava, and L. G. Reinholdt.  
723 2019. The Genome of C57BL/6J “Eve”, the Mother of the Laboratory Mouse Genome Reference  
724 Strain. *G3 Genes Genomes Genetics* 9: g3.400071.2019.
- 725 37. Potter, M. 1978. Antigen-Binding Myeloma Proteins of Mice. *Adv Immunol* 25: 141–211.

- 726 38. Potter, M., J. S. Wax, A. O. Anderson, and R. P. Nordan. 1985. Inhibition of plasmacytoma  
727 development in BALB/c mice by indomethacin. *J Exp Medicine* 161: 996–1012.
- 728 39. Vandamme, T. F. 2014. Use of rodents as models of human diseases. *J Pharm Bioallied Sci*  
729 6: 2–9.
- 730 40. Swearngen, J. R. 2018. Choosing the right animal model for infectious disease research.  
731 *Animal Model Exp Medicine* 1: 100–108.
- 732 41. Viney, M., L. Lazarou, and S. Abolins. 2015. The laboratory mouse and wild immunology.  
733 *Parasite Immunol* 37: 267–273.
- 734 42. Frazer, K. A., E. Eskin, H. M. Kang, M. A. Bogue, D. A. Hinds, E. J. Beilharz, R. V. Gupta,  
735 J. Montgomery, M. M. Morenzeni, G. B. Nilsen, C. L. Pethiyagoda, L. L. Stuve, F. M. Johnson,  
736 M. J. Daly, C. M. Wade, and D. R. Cox. 2007. A sequence-based variation map of 8.27 million  
737 SNPs in inbred mouse strains. *Nature* 448: 1050–1053.
- 738 43. Din, W., R. Anand, P. Boursot, D. Darviche, B. Dod, E. Jouvin-Marche, A. Orth, G. P.  
739 Talwar, P. -A. Cazenave, and F. Bonhomme. 1996. Origin and radiation of the house mouse:  
740 clues from nuclear genes. *J Evolution Biol* 9: 519–539.
- 741 44. Boursot, P., J. C. Auffray, J. Britton-Davidian, and F. Bonhomme. 1993. The Evolution of  
742 House Mice. *Annu Rev Ecol Syst* 24: 119–152.
- 743 45. Moulia, C., J. P. Aussel, F. Bonhomme, P. Boursot, J. T. Nielsen, and F. Renaud. 1991.  
744 Wormy mice in a hybrid zone: A genetic control of susceptibility to parasite infection. *J*  
745 *Evolution Biol* 4: 679–687.

- 746 46. Collins, A. M., Y. Wang, K. M. Roskin, C. P. Marquis, and K. J. L. Jackson. 2015. The  
747 mouse antibody heavy chain repertoire is germline-focused and highly variable between inbred  
748 strains. *Phil Trans R Soc B* 370: 20140236.
- 749 47. Solin, M. L., and M. Kaartinen. 1993. Immunoglobulin constant kappa gene alleles in twelve  
750 strains of mice. *Immunogenetics* 37: 401–407.
- 751 48. D’Hoostelaere, L. A., K. Huppi, B. Mock, C. Mallett, and M. Potter. 1988. The Ig kappa L  
752 chain allelic groups among the Ig kappa haplotypes and Ig kappa crossover populations suggest a  
753 gene order. *J Immunol Baltim Md 1950* 141: 652–61.
- 754 49. Kindt, T. J., C. Gris, J. L. Guenet, F. Bonhomme, and P. Cazenave. 1985. Lambda light chain  
755 constant and variable gene complements in wild-derived inbred mouse strains. *Eur J Immunol*  
756 15: 535–540.
- 757 50. Scott, C. L., J. F. Mushinski, K. Huppi, M. Weigert, and M. Potter. 1982. Amplification of  
758 immunoglobulin  $\lambda$  constant genes in populations of wild mice. *Nature* 300: 757–760.
- 759 51. Wade, C. M., E. J. Kulbokas, A. W. Kirby, M. C. Zody, J. C. Mullikin, E. S. Lander, K.  
760 Lindblad-Toh, and M. J. Daly. 2002. The mosaic structure of variation in the laboratory mouse  
761 genome. *Nature* 420: 574–578.
- 762 52. Wade, C. M., and M. J. Daly. 2005. Genetic variation in laboratory mice. *Nat Genet* 37:  
763 1175–1180.

- 764 53. Lees, W., C. E. Busse, M. Corcoran, M. Ohlin, C. Scheepers, F. A. Matsen, G. Yaari, C. T.  
765 Watson, T. A. Community, A. Collins, and A. J. Shepherd. 2019. OGRDB: a reference database  
766 of inferred immune receptor genes. *Nucleic Acids Res* 48: D964–D970.
- 767 54. Kikutani, H., and S. Makino. 1992. The Murine Autoimmune Diabetes Model: NOD and  
768 Related Strains. *Adv Immunol* 51: 285–322.
- 769 55. Masopust, D., C. P. Sivula, and S. C. Jameson. 2017. Of Mice, Dirty Mice, and Men: Using  
770 Mice To Understand Human Immunology. *J Immunol* 199: 383–388.
- 771 56. Schneider, V. A., T. Graves-Lindsay, K. Howe, N. Bouk, H.-C. Chen, P. A. Kitts, T. D.  
772 Murphy, K. D. Pruitt, F. Thibaud-Nissen, D. Albracht, R. S. Fulton, M. Kremitzki, V. Magrini,  
773 C. Markovic, S. McGrath, K. M. Steinberg, K. Auger, W. Chow, J. Collins, G. Harden, T.  
774 Hubbard, S. Pelan, J. T. Simpson, G. Threadgold, J. Torrance, J. M. Wood, L. Clarke, S. Koren,  
775 M. Boitano, P. Peluso, H. Li, C.-S. Chin, A. M. Phillippy, R. Durbin, R. K. Wilson, P. Flicek, E.  
776 E. Eichler, and D. M. Church. 2017. Evaluation of GRCh38 and de novo haploid genome  
777 assemblies demonstrates the enduring quality of the reference assembly. *Genome Res* 27: 849–  
778 864.
- 779 57. Scott, C. L., and M. Potter. 1984. Variation in V lambda genes in the genus *Mus*. *J Immunol*  
780 *Baltim Md* 1950 132: 2638–43.
- 781 58. Sitnikova, T., and M. Nei. 1998. Evolution of immunoglobulin kappa chain variable region  
782 genes in vertebrates. *Mol Biol Evol* 15: 50–60.

- 783 59. Schwartz, G. W., and U. Hershberg. 2013. Conserved variation: identifying patterns of  
784 stability and variability in BCR and TCR V genes with different diversity and richness metrics.  
785 *Phys Biol* 10: 035005.
- 786 60. Barak, M., N. S. Zuckerman, H. Edelman, R. Unger, and R. Mehr. 2008. IgTree©: Creating  
787 Immunoglobulin variable region gene lineage trees. *J Immunol Methods* 338: 67–74.
- 788 61. Heber–Katz, E., J. Leferovich, K. Bedelbaeva, D. Gourevitch, and L. Clark. 2004. The  
789 scarless heart and the MRL mouse. *Philosophical Transactions Royal Soc Lond Ser B Biological*  
790 *Sci* 359: 785–793.
- 791 62. Amrani, Y. M., D. Voegtlé, X. Montagutelli, P.-A. Cazenave, and A. Six. 2002. The Ig light  
792 chain restricted B6.κ-λSEG mouse strain suggests that the IGL locus genomic organization is  
793 subject to constant evolution. *Immunogenetics* 54: 106–119.
- 794 63. Mainville, C. A., K. M. Sheehan, L. D. Klaman, C. A. Giorgetti, J. L. Press, and P. H.  
795 Brodeur. 1996. Deletional mapping of fifteen mouse VH gene families reveals a common  
796 organization for three Igh haplotypes. *J Immunol Baltim Md 1950* 156: 1038–46.
- 797 64. Tutte, A., and R. Riblet. 1988. Duplications and deletions of Vh genes in inbred strains of  
798 mice. *Immunogenetics* 28: 125–135.
- 799 65. Steen, M.-L., L. Hellman, and U. Pettersson. 1987. The immunoglobulin lambda locus in rat  
800 consists of two Cλ genes and a single Vλ gene. *Gene* 55: 75–84.
- 801 66. Heiden, J. A. V., P. Stathopoulos, J. Q. Zhou, L. Chen, T. J. Gilbert, C. R. Bolen, R. J.  
802 Barohn, M. M. Dimachkie, E. Ciafaloni, T. J. Broering, F. Vigneault, R. J. Nowak, S. H.

803 Kleinstein, and K. C. O'Connor. 2017. Dysregulation of B Cell Repertoire Formation in  
804 Myasthenia Gravis Patients Revealed through Deep Sequencing. *J Immunol* 198: 1460–1473.

805

806

807

808

809

810

811

812

813

814

815

816

817

818

819

820

821

822

823

824

825



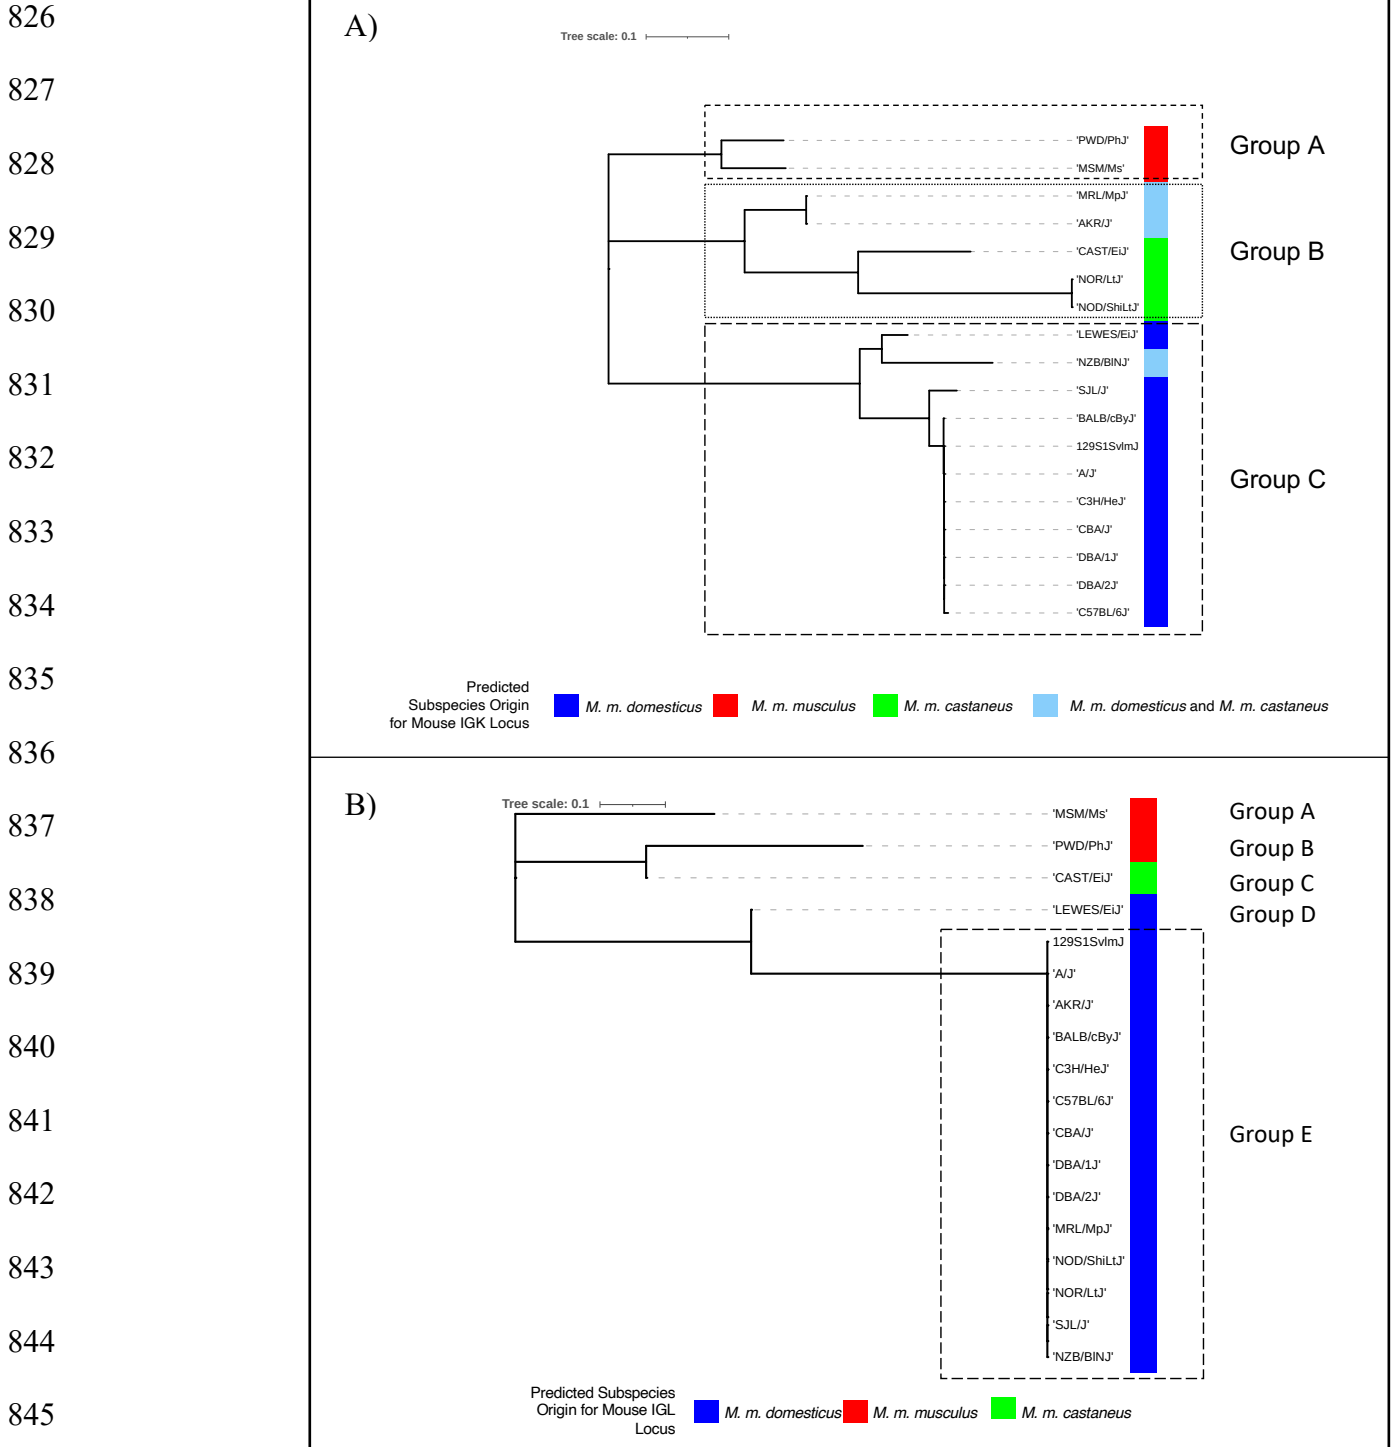

846 **Figure 1. IGK and IGL haplotype phylogenetic tree generated from SNP data spanning the**  
 847 **IGK and IGL loci. (A) IGK SNP-predicted phylogenetic tree. Color next to strains reflects the**  
 848 **predicted subspecies origin for each strain's IGK locus. Boxed clades represent three potential**

849 shared IGK haplotypes. Group A (PWD/PhJ, MSM/MsJ), Group B (MRL/MpJ, AKR/J,  
850 CAST/EiJ, NOR/LtJ, NOD/ShiLtJ), and Group C (LEWES/EiJ, NZB/BINJ, SJL/J, BALB/cByJ,  
851 129S1/SvImJ, A/J, C3H/HeJ, CBA/J, DBA/1J, DBA/2J, C57BL/6J).

852 (B) IGL SNP-predicted phylogenetic tree. Color next to strains reflects the predicted subspecies  
853 origin for each strain's IGL locus. Boxed strains (Group E) represent a potentially shared IGL  
854 haplotype.

855

856

857

858

859

860

861

862

863

864

865

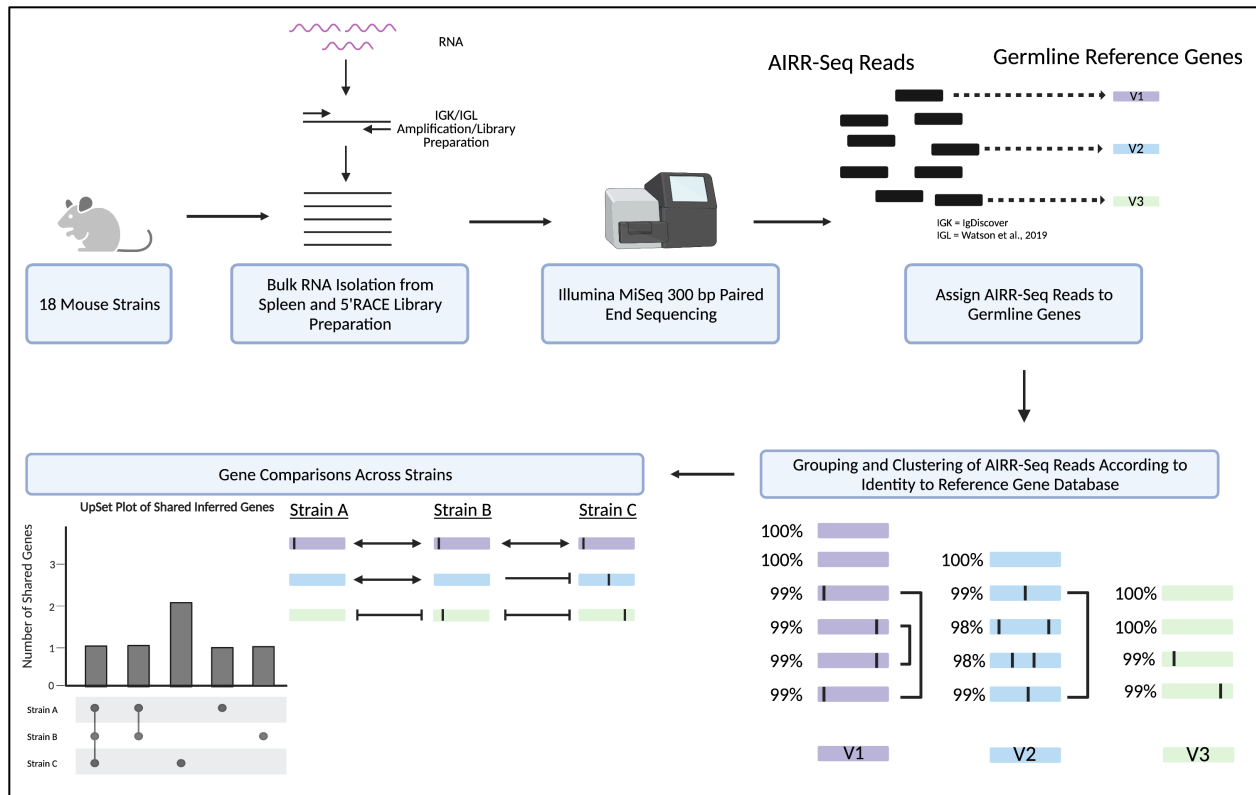

866

867 **Figure 2. Experimental overview for IGKV/IGLV germline gene inference.**

868 Briefly, RNA was extracted from 18 different inbred mouse strains, then 5'RACE was used to

869 generate IGK and IGL sequencing libraries. Next, libraries were sequenced on an Illumina

870 MiSeq instrument (2x300 bp PE Sequencing), then the AIRR-seq reads were assigned to

871 germline genes using either IgDiscover (IGKV) or our in-house pipeline (IGLV). After gene

872 assignment, AIRR-seq reads were grouped and clustered according to their identity to genes in

873 the IMGT reference gene database. Lastly, we visualized how the light chain germline gene

874 repertoires were shared across strains using UpSet plots. Created with BioRender.com.

875

876

877

878

879 **Table 1.** Subspecies origin and subspecies identity of the immunoglobulin kappa and lambda loci of classical laboratory and wild-  
880 derived mouse strains selected for IGKV and IGLV germline gene inference.

| Strain      | Subspecies Origin | Immunoglobulin Kappa Chain Subspecies identity by SNV Analysis | Immunoglobulin Lambda Chain Subspecies identity by SNV Analysis | Classical vs Wild-Derived | IGK SNP-Predicted Haplotype Group | IGL SNP-Predicted Haplotype Group | Number of IGK Illumina MiSeq Reads | Number of IGL Illumina MiSeq Reads |
|-------------|-------------------|----------------------------------------------------------------|-----------------------------------------------------------------|---------------------------|-----------------------------------|-----------------------------------|------------------------------------|------------------------------------|
| 129S1/SvImJ | N/A               | M. m. domesticus                                               | M. m. domesticus                                                | Classical                 | C                                 | E                                 | 1,145,322                          | 1,599,660                          |
| A/J         | N/A               | M. m. domesticus                                               | M. m. domesticus                                                | Classical                 | C                                 | E                                 | 1,286,740                          | 1,278,216                          |
| AKR/J       | N/A               | M. m. domesticus and M. m. castaneus                           | M. m. domesticus                                                | Classical                 | B                                 | E                                 | 655,738                            | 1,256,636                          |
| BALB/cByJ   | N/A               | M. m. domesticus                                               | M. m. domesticus                                                | Classical                 | C                                 | E                                 | 1,461,573                          | 1,717,669                          |
| C3H/HeJ     | N/A               | M. m. domesticus                                               | M. m. domesticus                                                | Classical                 | C                                 | E                                 | 1,403,724                          | 1,484,669                          |
| C57BL/6J    | N/A               | M. m. domesticus                                               | M. m. domesticus                                                | Classical                 | C                                 | E                                 | 1,063,818                          | 1,327,303                          |
| CAST/EiJ    | M. m. castaneus   | M. m. castaneus                                                | M. m. castaneus                                                 | Wild-derived              | B                                 | C                                 | 1,125,129                          | 2,020,994                          |
| CBA/J       | N/A               | M. m. domesticus                                               | M. m. domesticus                                                | Classical                 | C                                 | E                                 | 1,003,013                          | 1,795,640                          |
| DBA/1J      | N/A               | M. m. domesticus                                               | M. m. domesticus                                                | Classical                 | C                                 | E                                 | 1,015,408                          | 1,690,039                          |
| DBA/2J      | N/A               | M. m. domesticus                                               | M. m. domesticus                                                | Classical                 | C                                 | E                                 | 707,388                            | 1,600,720                          |
| LEWES/EiJ   | M. m. domesticus  | M. m. domesticus                                               | M. m. domesticus                                                | Wild-derived              | C                                 | D                                 | 1,822,863                          | 2,386,907                          |
| MRL/MpJ     | N/A               | M. m. domesticus and M. m. castaneus                           | M. m. domesticus                                                | Classical                 | B                                 | E                                 | 1,777,206                          | 2,001,406                          |
| MsM/MsJ     | M. m. mollosinus  | M. m. musculus                                                 | M. m. musculus                                                  | Wild-derived              | A                                 | A                                 | 1,322,823                          | 1,754,050                          |
| NOD/ShiLtJ  | N/A               | M. m. castaneus                                                | M. m. domesticus                                                | Classical                 | B                                 | E                                 | 1,166,675                          | 1,347,448                          |
| NOR/LtJ     | N/A               | M. m. castaneus                                                | M. m. domesticus                                                | Classical                 | B                                 | E                                 | 1,081,493                          | 1,505,559                          |
| NZB/BINJ    | N/A               | M.m. castaneus and M. m. domesticus                            | M. m. domesticus                                                | Classical                 | C                                 | E                                 | 669,641                            | 1,475,349                          |
| PWD/PhJ     | M. M. musculus    | M. m. musculus                                                 | M. m. musculus                                                  | Wild-derived              | A                                 | B                                 | 1,455,566                          | 2,162,093                          |
| SJL/J       | N/A               | M. m. domesticus                                               | M. m. domesticus                                                | Classical                 | C                                 | E                                 | 954,850                            | 1,597,060                          |

881

882

883

884

885

886

887

888

889

890

891

892

893

894

895

896

897

898

899

900

901

902

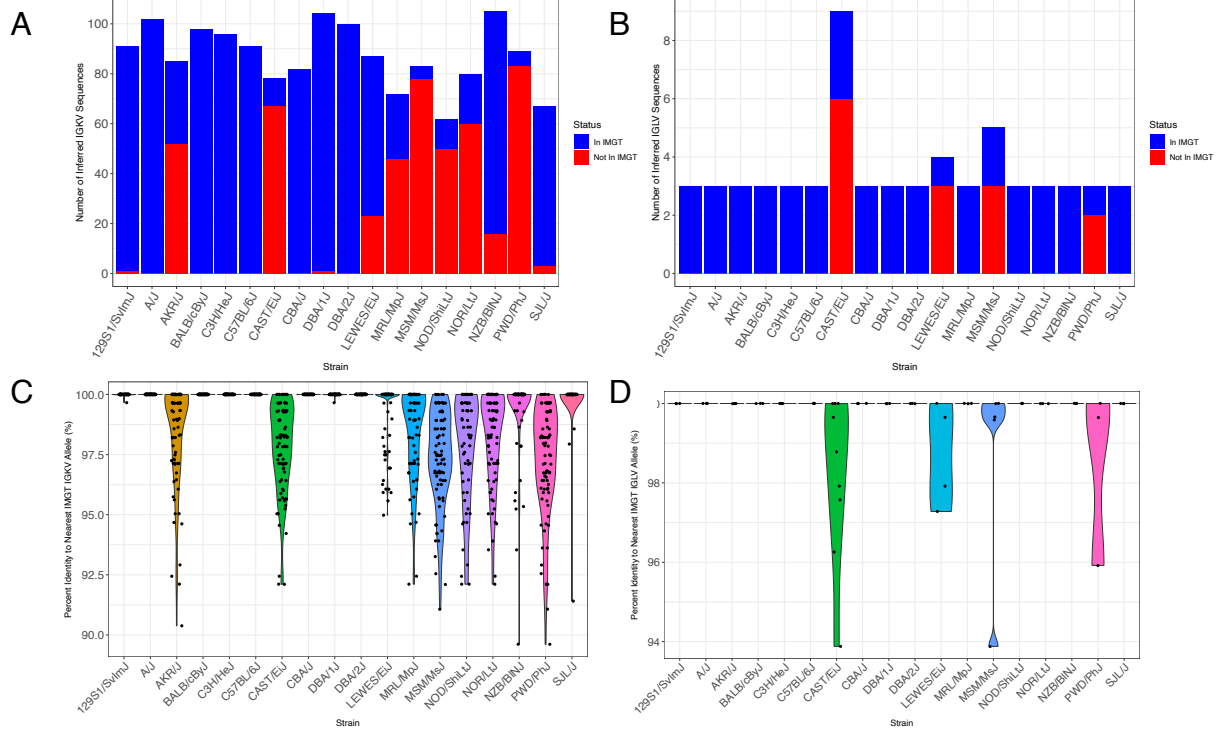

**Figure 3. Representation of inferred IGKV and IGLV germline sequences in IMGT gene**

**database. (A and B) Bar plots depicting IGKV (A) and IGLV (B) inference counts for each**

**strain and whether the inferences were present or absent in the IMGT Gene Database. (C and D)**

**Violin plots depicting sequence alignment percent identity of IGKV (C) and IGLV (D)**

**inferences to the IMGT Gene Database.**

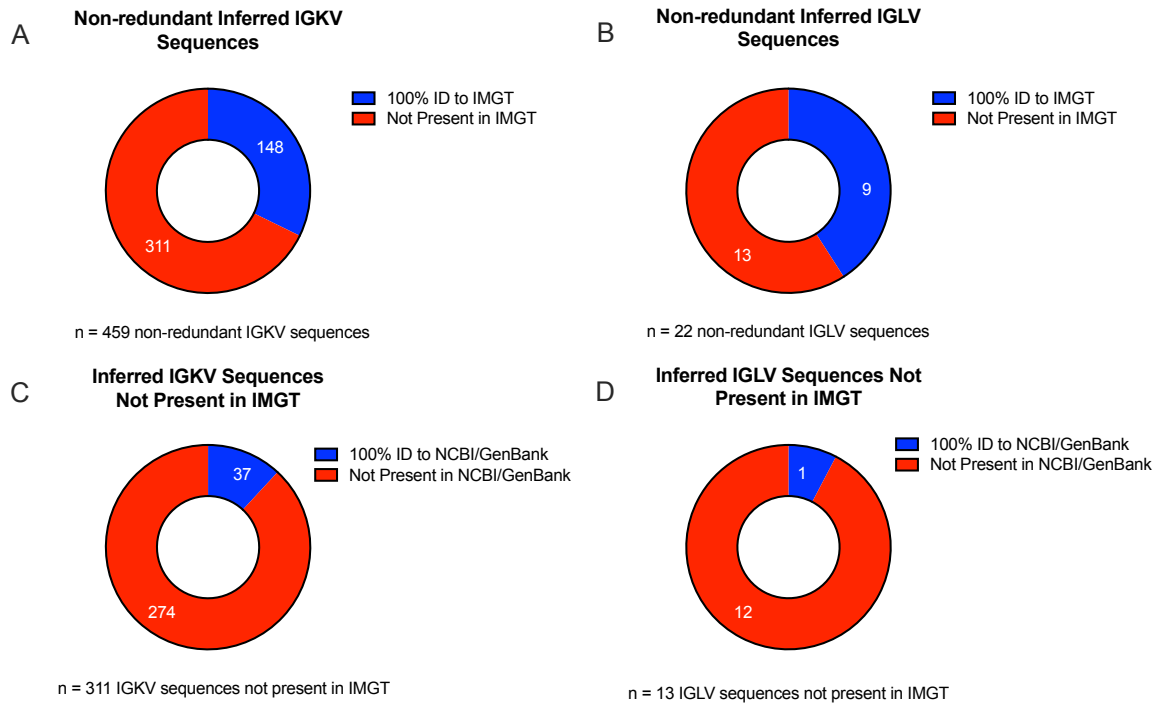

903

904

905 **Figure 4. Presence and absence of non-redundant IGKV and IGLV inferred sequences in existing**

906 **gene databases. (A and B) Non-redundant IGKV (A) and IGLV (B) sequences present/absent in IMGT**

907 **gene database. (C and D) Donut plots depicting the 311 IGKV (C) and 13 IGLV (D) inferences missing**

908 **from IMGT and their presence/absence in NCBI/GenBank.**

909

910

911

912

913

914

915

916

917

918

919

920

921

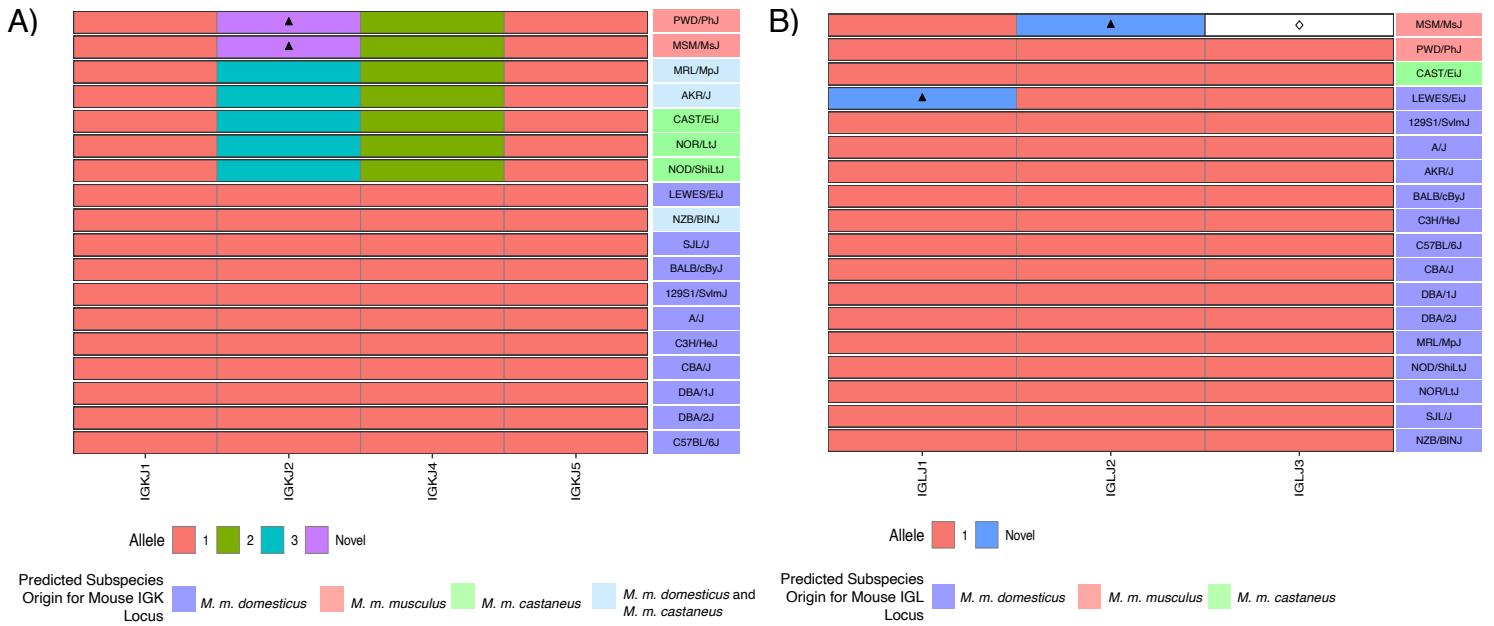

931 **Figure 5. Inferred IGKJ and IGLJ novel alleles.** A) A single IGKJ2 novel allele was inferred for  
 932 PWD/PhJ and MSM/MsJ (5'-TGTACACGTTCCGGATCGGGGACCAAGCTGGAAATAAAAC-3'). B)  
 933 Two novel alleles were inferred for IGLJ: Novel IGLJ1 allele (5'-  
 934 CTGGGTGTTCCGGTGGAGGAACCAAATTGACTGTCCTAG-3') and novel IGLJ2 (5'-  
 935 TTATGTTTTTCGGCAGTGGAACCAAGGTCACTGTCCTAG-3'). Bolded positions are novel SNPs  
 936 that diverge from IMGT reference sequence.

937

938

939

940

941

942

943

944

945

946

947

948 A)

949

950

951

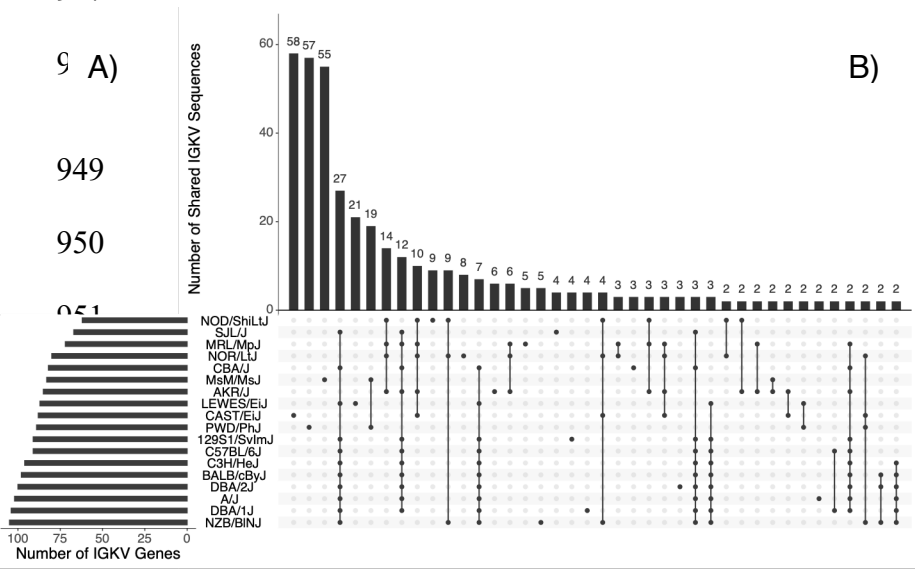

B)

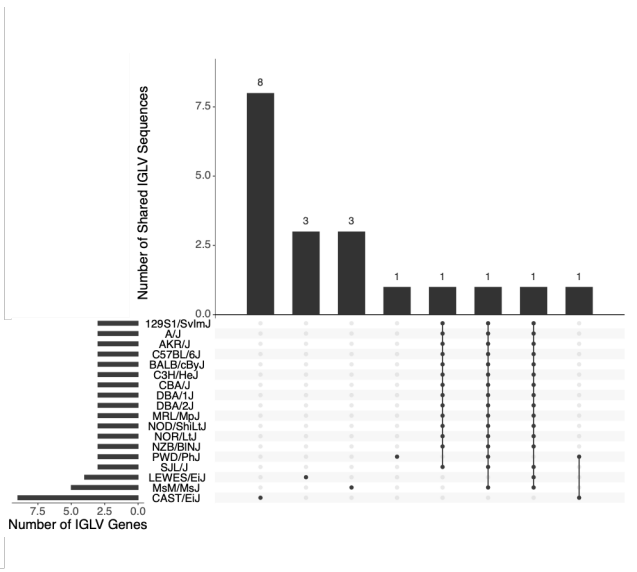

955

956

957

958

959

960

961

962

**Figure 6. Shared and unique IGKV and IGLV germline repertoires.** UpSet plots depicting the size of the germline IGKV (A) and IGLV (B) set from 18 mouse strains and the number of sequences that were unique to a given strain (dot) or shared among strains (connected dots).



963

964

965

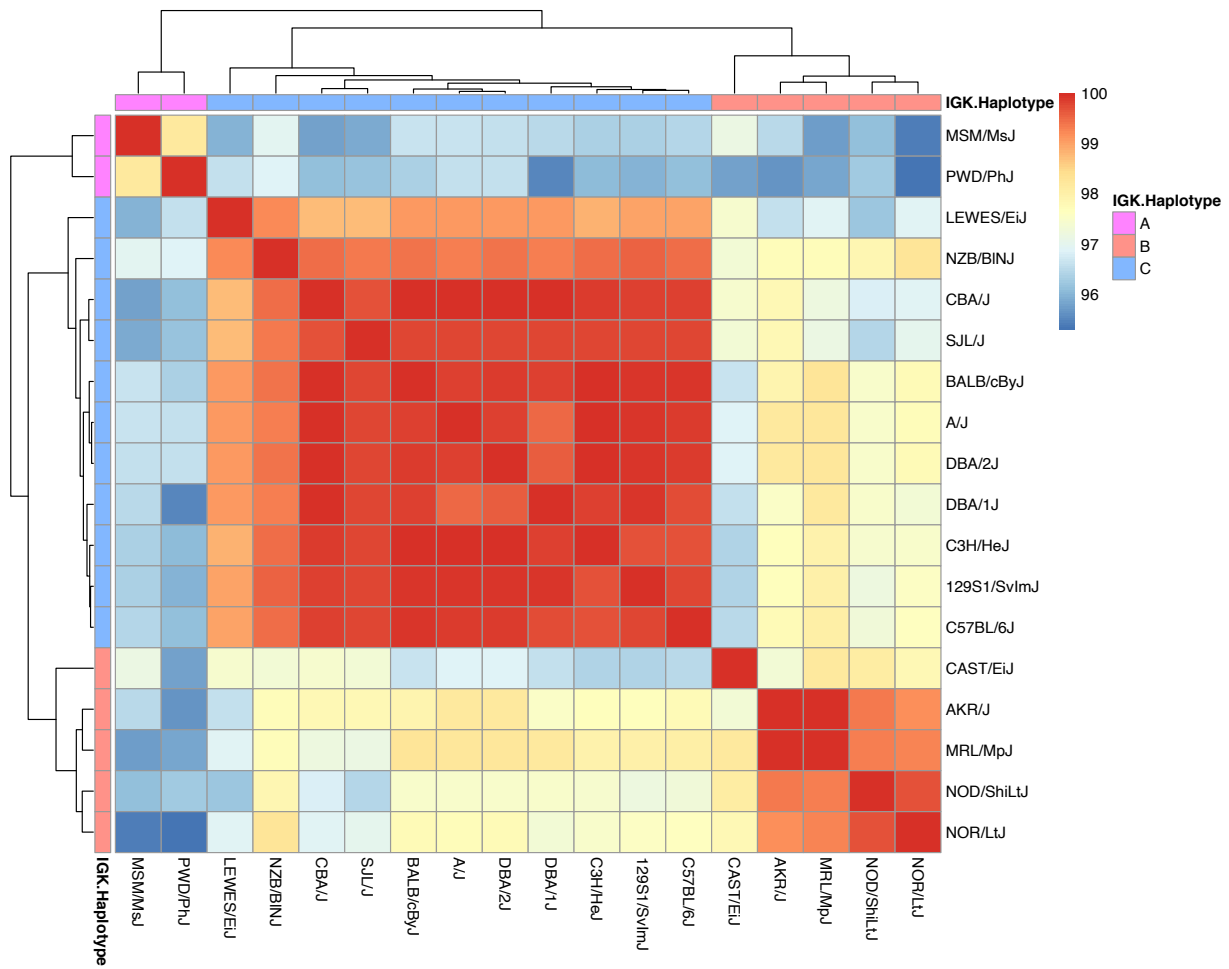

966

967 **Figure 7. All-by-all pairwise comparisons of inferred IGKV germline genes show evidence**

968 **of strain clustering according to the assigned IGK haplotype group.** Heatmap depicting the

969 mean percentage sequence match identities among inferred IGKV germline sets for each

970 pairwise strain comparison.

971

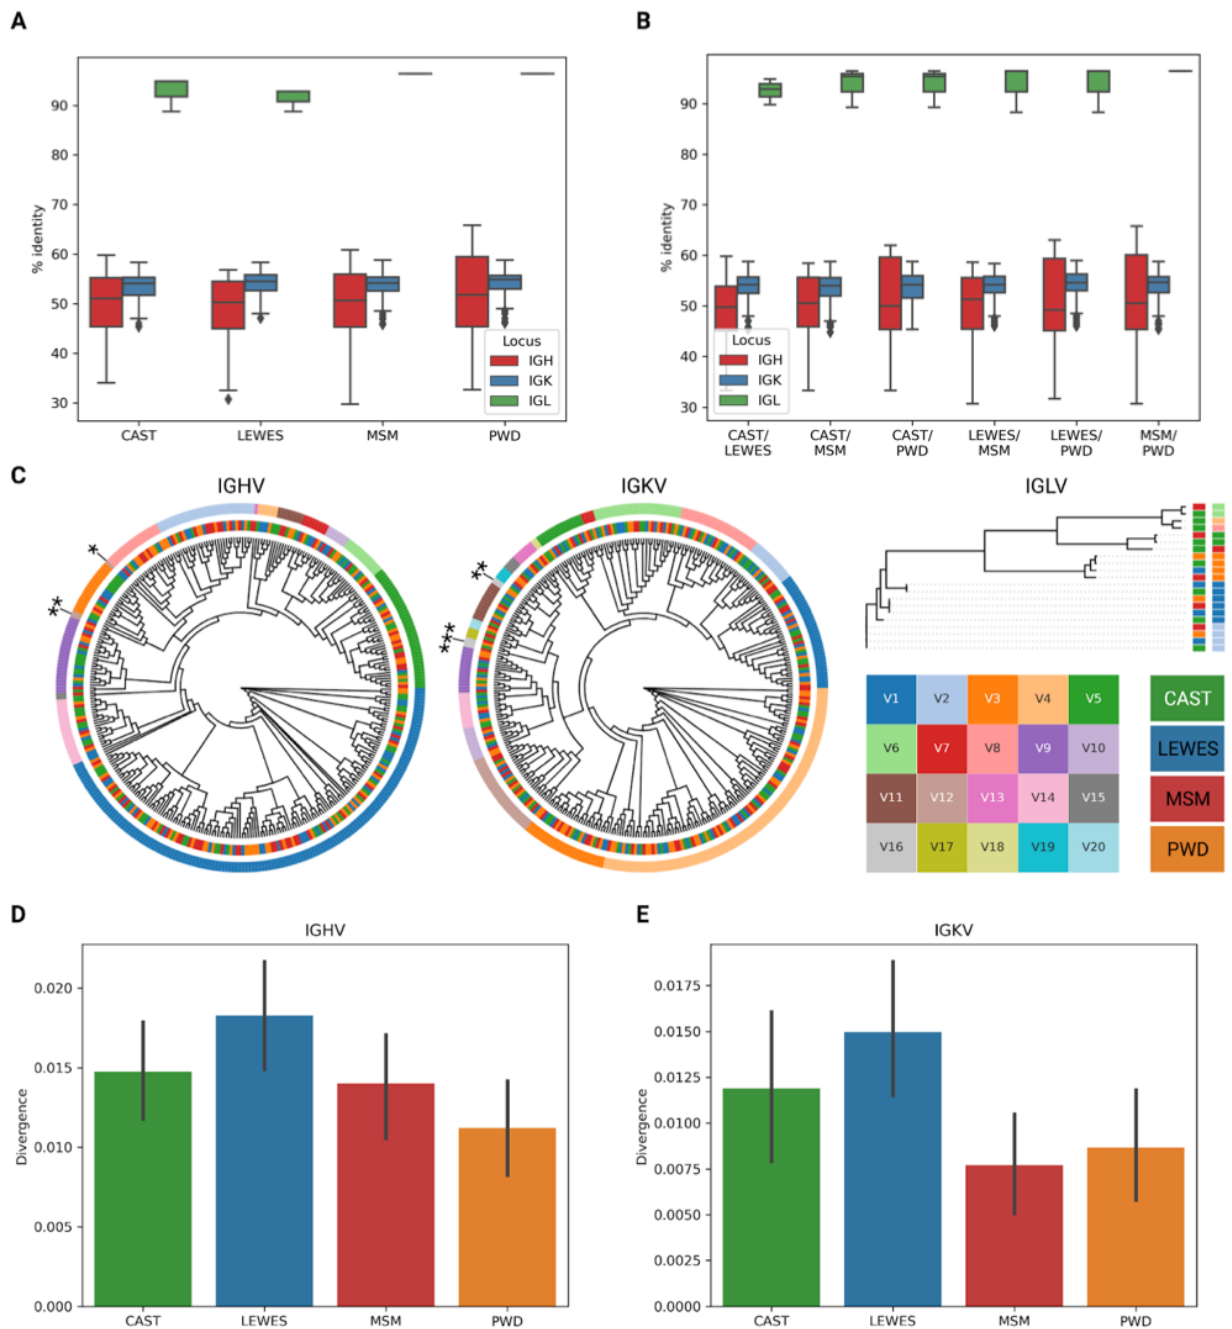

972

973 **Figure 8. Phylogenetic analysis of mouse immunoglobulin V genes.** (A) Percent identities of

974 IGHV, IGKV, and IGLV genes of CAST, LEWES, MSM, and PWD mouse strains. Each bar

975 represents a single mouse strain (CAST, LEWES, MSM, or PWD) and a locus (IGH, IGK, or IGL)

976 and shows the distribution of the median percent identities of corresponding V genes. (B) Percent

977 identities of IGHV, IGKV, and IGLV genes for all pairs of mouse strains. (C) Phylogenetic trees  
978 for IGHV, IGKV, and IGLV genes. Genes from families IGHV12 and IGKV16 that do not form  
979 single subtrees in the corresponding phylogenetic trees are labeled with asterisks. (D) The  
980 distributions of divergences of IGHV genes across mouse strains with respect to the consensus  
981 of clusters computed as subtrees of the phylogenetic tree of IGHV genes of length  $0.1L$ , where  $L$   
982 is the height of the tree. (E) The distributions of divergences of IGKV genes computed in the same  
983 way as the distributions shown in (D).

984

985

986

987

988

989

990

991

992

993

994

995

996

997

998

999

1000

1001

1002

1003
